# Supplementary material for: Novel targets for engineering Physostegia chlorotic mottle and tomato brown rugose fruit virus-resistant tomatoes: in silico prediction of tomato microRNA targets
Source: PeerJ journal article supplement (doi:10.7717/peerj.10096), 2020-10-27
Supplement: Table_S1.xlsx [file Table_S1.xlsx]

## Sheet: Table S1
TomiRNA			miRanda		RNAhybrid		RNA22		Tapirhybrid		psRNATarget
Number	Name	Sequence	PhCMoV	ToBRFV	PhCMoV	ToBRFV	PhCMoV	ToBRFV	PhCMoV	ToBRFV	PhCMoV	ToBRFV
1	miR10528	AAUGCAAUGUCAUAUACCAUC		1	1	1		1		2	3	4
2	miR10529	AACGAGUGAGACUUGCUCAGUUGG			1	1		1
3	miR10530	ACGUCCCUUCCCCAUCGUUCAACA	1		1	1	1					2
4	miR10531	UGGGGUCCUAGUAGAGUCGGUUC	3		1	1	7	2			2
5	miR10532	AAGUGUGUCUCUGAGAUUUCGGGC			1	1		1			2
6	miR10533	UCUUAUGAAUUCUAGGUCUUCU			1	1	1	1		1	3
7	miR10534	CAAAAUACCCUUGUCAUCCAA			1	1					2	3
8	miR10535a	UUGGCAUAAGUUUGUGAAAGCCGG	3	1	1	1	2				1	2
9	miR10535b	UUGGCAUGAGUUUGUGAAAGCCGG	1		1	1	2	1				2
10	miR10536	AGACAUGUUCUAAUCGUCAGCUUC		2	1	1	1			1
11	miR10537	AUUUACCCCAAGUUCGUUGUC			1	1	1					1
12	miR10538	AGAUUGAUAUACGUUACUCACAGU			1	1	1				1
13	miR10539	CUUGGAACCACAGUUACCACC			1	1					2	1
14	miR10540	AUAAUAACUAUUAGUUGAAUG							1		2	1
15	miR10541	AGUCACUUUGAUGAUUGUCAAACA		1	1	1		1	1		2	1
16	miR10542	UAGAAGAAUCAUAUAUACCCCUA			1	1					1	1
17	miR156a	UUGACAGAAGAUAGAGAGCAC			1	1			1	1	2	2
18	miR156b	UUGACAGAAGAUAGAGAGCAC			1	1			1	1	2	2
19	miR156c	UUGACAGAAGAUAGAGAGCAC			1	1			1	1	2	2
20	miR156d-3p	GCUCACUGCUCUAUCUGUCACC	1		1	1	2				3	1
21	miR156d-5p	UGACAGAAGAGAGUGAGCAC	1		1	1	1				2	1
22	miR156e-3p	GCUUACUCUCUAUCUGUCACC			1	1	5		1		2
23	miR156e-5p	UGAUAGAAGAGAGUGAGCAC			1	1	5		1		4
24	miR159	UUUGGAUUGAAGGGAGCUCUA			1	1	5
25	miR159b	UUGGAAAGAAGGGAGCUCUAC			1	1
26	miR160a	UGCCUGGCUCCCUGUAUGCCA			1	1	4	2			1
27	miR162	UCGAUAAACCUCUGCAUCCAG			1	1			1		3	1
28	miR164a-3p	CAUGUGCCUGUUUUCCCCAUC		1	1	1	2				1
29	miR164a-5p	UGGAGAAGCAGGGCACGUGCA	1		1	1	6	1	1		3
30	miR164b-3p	CACGUGUUCUCCUUCUCCAAC	1		1	1	2	1		1	2
31	miR164b-5p	UGGAGAAGCAGGGCACGUGCA	1		1	1	6	1	1		3
32	miR166a	UCGGACCAGGCUUCAUUCCCC	1		1	1	1	1	1		2	2
33	miR166b	UCGGACCAGGCUUCAUUCCCC	1		1	1	1	1	1		2	2
34	miR166c-3p	UCGGACCAGGCUUCAUUCCUC	1		1	1	1	1			2	2
35	miR166c-5p	GGGAUGUUGUCUGGCUCGACA	2		1	1	8	1	1	1	1	2
36	miR167a	UGAAGCUGCCAGCAUGAUCUA			1	1				1
37	miR167b-3p	AGGUCAUCUAGCAGCUUCAAU			1	1					3
38	miR167b-5p	UAAAGCUGCCAGCAUGAUCUGG			1	1					1	3
39	miR168a-3p	CCUGCCUUGCAUCAACUGAAU	1		1	1	1				2
40	miR168a-5p	UCGCUUGGUGCAGGUCGGGAC			1	1	1			1	1
41	miR168b-3p	CCCGCCUUGCAUCAACUGAAU			1	1		1
42	miR168b-5p	UCGCUUGGUGCAGGUCGGGAC			1	1	1			1	1
43	miR169a	CAGCCAAGGAUGACUUGCCGG			1	1					1
44	miR169b	UAGCCAAGGAUGACUUGCCUG			1	1						4
45	miR169c	CAGCCAAGGAUGACUUGCCGA			1	1					1
46	miR169d	UAGCCAAGGAUGACUUGCCUA			1	1						4
47	miR169e-3p	UGGCAAGCAUCUUUGGCGACU		1	1	1						4
48	miR169e-5p	UAGCCAAGGAUGACUUGCCUUU			1	1						4
49	miR169f	UAGGCGUUGUCUGAGGCUAAC			1	1		1				1
50	miR171a	UGAUUGAGCCGUGCCAAUAUC			1	1					2
51	miR171b-3p	UUGAGCCGUGCCAAUAUCACG			1	1				1	1	1
52	miR171b-5p	AUAUUGGUGCGGUUCAAUUAG			1	1					1
53	miR171c	UAUUGGUGCGGUUCAAUGAGA			1	1			1		1
54	miR171d	UUGAGCCGCGCCAAUAUCAC			1	1					1	1
55	miR171e	UUGAGCCGCGUCAAUAUCUCU			1	1					1
56	miR171f	UAUUGGCCUGGUUCACUCAGA	1		1	1					1
57	miR172a	AGAAUCUUGAUGAUGCUGCAU			1	1	1				4
58	miR172b	AGAAUCUUGAUGAUGCUGCAU			1	1	1				4
59	miR172c	AGAAUCUUGAUGAUGCUGCAG			1	1	1		1		4
60	miR172d	GGAAUCUUGAUGAUGCUGCAG			1	1	2				2
61	miR1916	AUUUCACUUAGACACCUCAA	1		1	1			1	1	2	1
62	miR1917	AUUAAUAAAGAGUGCUAAAGU			1						2	1
63	miR1918	UGUUGGUGAGAGUUCGAUUCUC	3		1	1	5	1	3		2
64	miR1919a	ACGAGAGUCAUCUGUGACAGG		1	1	1				1		1
65	miR1919b	ACGAGAGUCAUCUGUGACAGG		1	1	1				1		1
66	miR1919c-3p	ACGAGAGUCAUCUGUGACAGG		1	1	1				1		1
67	miR1919c-5p	UGUCGCAGAUGACUUUCGCCC	1		1	1		2	1
68	miR319a	CUUGGACUGAAGGGAGCUCC			1	1	2	3				1
69	miR319b	UUGGACUGAAGGGAGCUCCCU			1	1	1	2			1	2
70	miR319c-3p	UUGGACUGAAGGGAGCUCCUU		1	1	1		2			1	2
71	miR319c-5p	AGAGCUUCCUUCAGCCCACUC			1	1	1
72	miR319d	AGGAAACUGUUUAGUCCAACC			1	1			1			1
73	miR390a-3p	CGCUAUCCAUCCUGAGUUUUA			1	1	1		1	1		1
74	miR390a-5p	AAGCUCAGGAGGGAUAGCACC			1	1
75	miR390b-3p	CGCUAUCCAUCCUGAGUUUCA			1	1	1		1			2
76	miR390b-5p	AAGCUCAGGAGGGAUAGCGCC			1	1
77	miR391	ACGCAGGAGAGAUGAUGCUGGA		1	1	1	1	3		1		1
78	miR393	AUCAUGCGAUCUCUUCGGAAU			1	1					4
79	miR394-3p	AGGUGGGCAUACUGUCAACA			1	1				1
80	miR394-5p	UUGGCAUUCUGUCCACCUCC			1	1	3		2		2	1
81	miR395a	CUGAAGUGUUUGGGGGAACUCC			1	1	4				1	1
82	miR395b	CUGAAGUGUUUGGGGGAACUCC			1	1	4				1	1
83	miR396a-3p	GUUCAAUAAAGCUGUGGGAAG			1	1
84	miR396a-5p	UUCCACAGCUUUCUUGAACUG	1		1	1	1		2		2	2
85	miR396b	UUCCACAGCUUUCUUGAACUU	1		1	1	2		1		2	2
86	miR397-3p	UCAACGCUAAACUCGAUCAUG			1	1					1
87	miR397-5p	AUUGAGUGCAGCGUUGAUGA			1	1	3				1
88	miR398a	UAUGUUCUCAGGUCGCCCCUG			1	1	2				1	1
89	miR399	UGCCAAAGGAGAGUUGCCCUA			1	1		1
90	miR399b	GGGCUACUCUCUAUUGGCAUG		1	1	1	2	1	1	2	1	1
91	miR403-3p	CUAGAUUCACGCACAAGCUCG			1	1					1
92	miR403-5p	CGUUUGUGCGUGAAUCUAACA			1	1					1
93	miR408	ACGGGGACGAGCCAGAGCAUG			1	1	1		2		2
94	miR477-3p	AGUUCUUGUAGGGUGAGACAAC	3		1	1					5
95	miR477-5p	UGUCUCUCCCUCAAGGGCUCC	1		1	1	5				2
96	miR482a	UUUCCAAUUCCACCCAUUCCUA	1		1	1			1		4	1
97	miR482b	UCUUGCCUACACCGCCCAUGCC			1	1	2				2
98	miR482c	UCUUGCCAAUACCGCCCAUUCC		1	1	1	2	1	1	1	4	2
99	miR482d-3p	UUUCCUAUUCCACCCAUGCCAA			1	1	1				4
100	miR482d-5p	GGAGUGGGUGGGAUGGAAAAA	1		1	1	6	3	1	1
101	miR482e-3p	UCUUUCCUACUCCUCCCAUACC	1		1	1	1				6
102	miR482e-5p	UGUGGGUGGGGUGGAAAGAUU	1		1	1	10	2			1
103	miR530	AGGUGUAGGUGUUCAUGCAGA			1	1	6	1				1
104	miR5300	UCCCCAGUCCAGGCAUUCCAAC	1		1	1	2	2	1		1
105	miR5302a	AAACGAGGUUUGUUACUUUGG			1	1				1		1
106	miR5302b-3p	UUUUCAACUAUAGCAUUAUUUU			1	1			1		3	1
107	miR5302b-5p	UGAAAUGCUAUAGUUGGAAAGU			1	1					1	1
108	miR5303	UUUUUGAAGAGUUCGAGCAAC	1		1	1	1	1	1		4
109	miR5304	UCAAUGCUACAUACUCAUCCC	1		1	1			1		6	1
110	miR6022	UGGAAGGGAGAAUAUCCAGGA	1		1	1		1			1	1
111	miR6023	UUCCAUGAAAGAGUUUUUGGAU			1	1	1	1	1		1	1
112	miR6024	UUUUAGCAAGAGUUGUUUUACC			1	1					3
113	miR6025	UACCAAUAAUUGAGAUAACAUC									2	1
114	miR6026	UUCUUGGCUAGAGUUGUAUUGC	1	1	1	1	6	1	1	2	2	1
115	miR6027-3p	UGAAUCCUUCGGCUAUCCAUAA			1	1					2
116	miR6027-5p	AUGGGUAGCACAAGGAUUAAUG			1	1	1	1				1
117	miR7981a	ACCCCUUUUCGGCCUACGUGGCAC	2		1	1						1
118	miR7981b	ACCCCUUUUUAGCUUACGUGGCAC	2		1	1					1
119	miR7981c	UCGAAAUCUCAGAGACACACUUAU			1	1					1	1
120	miR7981d	UCGAAAUCUCAGAGACACACUUAU			1	1					1	1
121	miR7981e	AAGUGUGUCUCUGAGAUUUCGGAU			1	1	1	1			3
122	miR7981f	AAGUGUGUCUCUGGAAUUUCGGGC	1		1	1	3	1			3
123	miR827	UUAGAUGAACAUCAACAAACA			1							2
124	miR9469-3p	AUUCGGUCUUCUUAUGUGGAC			1	1	3	1			1	1
125	miR9469-5p	CCACAUAAGAAGACCGAAUUC			1	1
126	miR9470-3p	UUUGGCUCAUGGAUUUUAGC			1	1					3	3
127	miR9470-5p	UGAAAUCCAUGAGCCUAAACU			1	1	1		1		1	1
128	miR9471a-3p	UUGGCUGAGUGAGCAUCACGG	1		1	1	4	1	1		3
129	miR9471a-5p	CAGGUGCUCACUCAGCUAAUA			1	1	1				4	1
130	miR9471b-3p	UUGGCUGAGUGAGCAUCACUG	1		1	1	4	1	1		3
131	miR9471b-5p	GAGGUGCUCACUCAGCUAAUA			1	1	2	1			3
132	miR9472-3p	UUCACAAUCUCUGCUGAAAAA			1	1					2	3
133	miR9472-5p	UUUCAGUAGACGUUGUGAAUA	1		1	1	1					1
134	miR9473-3p	AAACGAGUUCAGAUUUACAGC			1	1						1
135	miR9473-5p	UGGCUGUAAAUCUAAACUCGU			1	1	1			1	1	1
136	miR9474-3p	UUUUGUUCGCAGAUACUACAGU			1	1	1				1	3
137	miR9474-5p	UGUAGAAGUCAUGAAUAAAAUG			1
138	miR9475-3p	CUACAAUGUAGAGAUCGUUUU			1	1			1	1	3
139	miR9475-5p	AACGAUCUCUACAUUGUAGGC			1	1	1				4	1
140	miR9476-3p	AAAAAGAUGCAGGACUAGACC			1	1				1	2	1
141	miR9476-5p	UCUAGUCCUGCAUCUUUUUUU			1	1	2
142	miR9477-3p	UUGGGAAAGGGAACAACUGAUAGU			1	1	2	1			2	1
143	miR9477-5p	UAUCCGUUGUUCCCUUUUCCUACC			1	1					2
144	miR9478-3p	UUCGAUGACAUAUUUGAGCCU			1	1					3
145	miR9478-5p	GCUUAAAUAUGUAGAUCGAACU			1	1			1		1
146	miR9479-3p	GAGAAUGGUAGAGGGUCGGACC			1	1	4				3
147	miR9479-5p	UCCAGUCCUCUACCCUUCUCCA	1		1	1	1		1		3
Count			38	14	145	142	74	41	41	27	107	75
