# Supplementary material for: Novel targets for engineering Physostegia chlorotic mottle and tomato brown rugose fruit virus-resistant tomatoes: in silico prediction of tomato microRNA targets
Source: PeerJ journal article supplement (doi:10.7717/peerj.10096), 2020-10-27
Supplement: Table_S2.xlsx [file Table_S2.xlsx]

## Sheet: Sheet1
Virus	TomiRNAs	Nucleotide position on consensus sequence		Conservation percentage
		From	To
PhCMoV	miR6026	2663	2684	1
	miR408	4929	4949	1
	miR1918	5058	5078	0.955
	miR394-5p	6486	6503	0.944
	miR10541	6874	6896	0.957
	miR396a-5p	7925	7944	0.9
	miR164b-3p	8494	8516	0.957
	miR482a	8611	8632	0.955
	miR5300	9285	9306	0.909
	miR168a-3p	9878	9899	0.955
	miR1916	10935	10955	0.955
	miR477-3p	11628	11649	1
	miR166c-5p	11956	11976	0.952
	miR5303	13248	13268	1
ToBRFV	miR10528	659	1755	0.909
	miR399b	1024	1045	1
	miR10528	1734	1755	1
	miR391	2213	2234	1
	miR6026	2332	2354	1
	miR171b-3p	2484	2505	1
	miR319c-3p	2755	2775	1
	miR10536	3009	3030	0.955
	miR1919a/miR1919b/miR1919c-3p	4898	4919	1
	miR482c	5301	5322	0.955
